# Supplementary material for: Autocrine, paracrine and necrotic NMDA receptor signalling in mouse pancreatic neuroendocrine tumour cells
Source: PubMed Central journal article supplement (PMC5746548; doi:10.1098/rsob.170221), 2017-12-20
Supplement: rsob170221supp2.pdf [file rsob170221supp2.pdf]

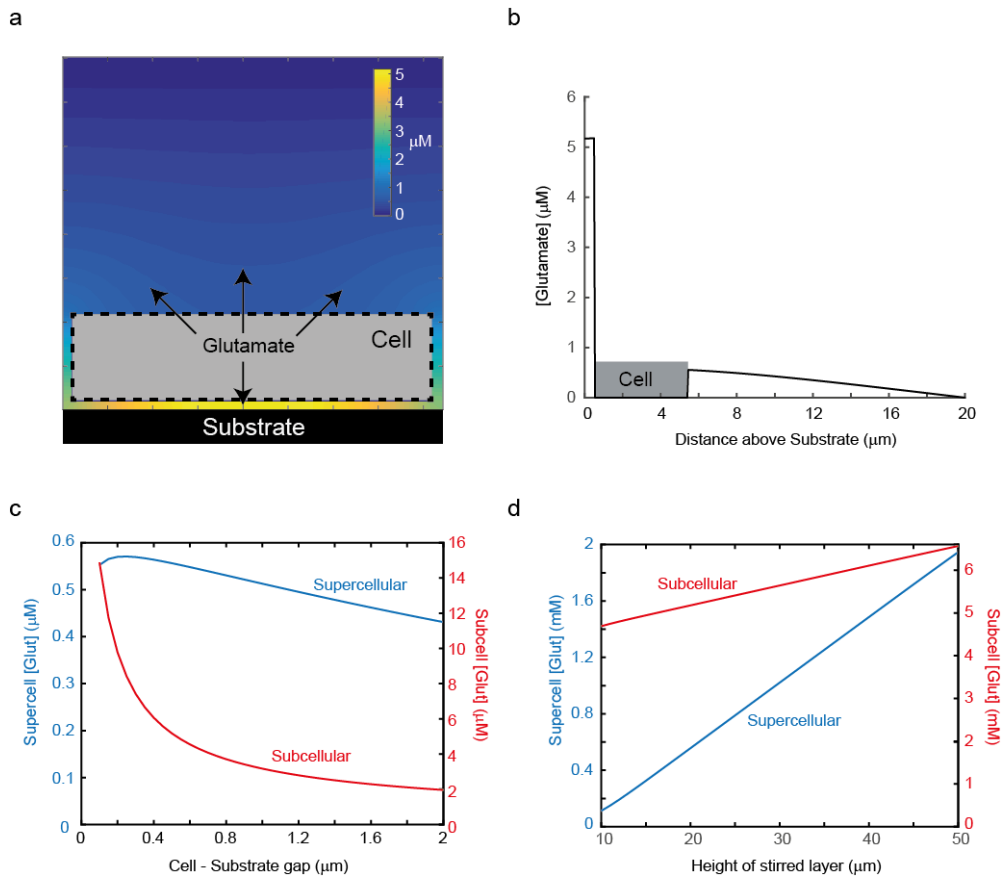

**Supplementary Figure 1. (Electronic Supplementary Information).** Computational model of diffusion of released glutamate. a) steady-state 2D distribution of glutamate computed for a cell which is 20 X 5  $\mu\text{m}$  in cross-section, separated by a 0.5  $\mu\text{m}$  gap from the underlying substrate and from reflecting side barriers representing the adjacent cells, and releases glutamate at a rate of  $10^{-8}$  fmoles per  $\mu\text{m}^2$  of membrane surface per ms. Height of stirred layer is 20  $\mu\text{m}$  above substrate. b) Corresponding steady-state profile of glutamate in a section taken at the centre of the cell. c) Subcellular glutamate concentration (red curve) increases sharply as the gap between cell and substrate is reduced, while the concentration of glutamate above the cell (blue curve) is relatively insensitive to the gap distance. d) subcellular glutamate concentration is much less dependent on the height of the absorbing well-stirred layer than supercellular glutamate concentration.
